# Supplementary material for: Transition metals (Fe, Co, and Ni) encapsulated in nitrogen-doped carbon nanotubes as bi-functional catalysts for oxygen electrode reactions
Source: Royal Society of Chemistry journal article supplement (doi:10.1039/c5ta10551j), 2016-01-01
Supplement: c5ta10551j1.pdf [file c5ta10551j1.pdf]

## **Supporting Information**

### **Transitional Metal (Fe, Co, Ni) Encapsulated in Nitrogen-Doped Carbon Nanotubes as Bifunctional Catalysts for Oxygen Electrode Reactions**

Yanyan Liu, Hongliang Jiang, Yihua Zhu,\* Xiaoling Yang and Chunzhong Li\*

Key Laboratory for Ultrafine Materials of Ministry of Education, School of Materials Science and Engineering, East China University of Science and Technology, Shanghai, 200237, P. R. China.

E-mail: yhzhu@ecust.edu.cn (Prof. Y. H. Zhu), czli@ecust.edu.cn (Prof. C.Z. Li),

Fax: +86 21 64250624

\*Author(s) to whom correspondence should be addressed.

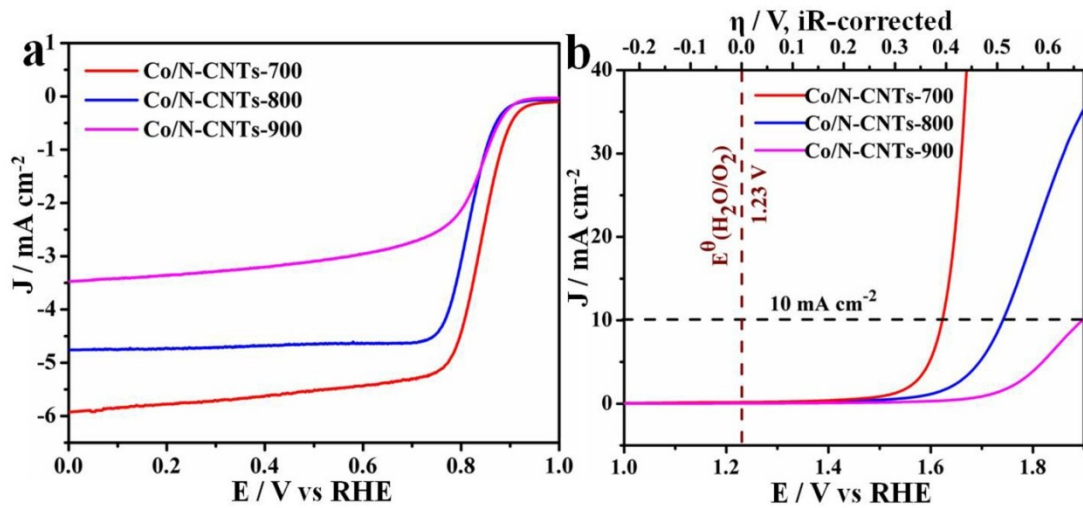

**Fig. S1** Polarization curves of Co/N-CNTs catalysts in RDE tests (rotation rate:1500 rpm; pH 13; loading: 0.2 mg cm<sup>-2</sup>).

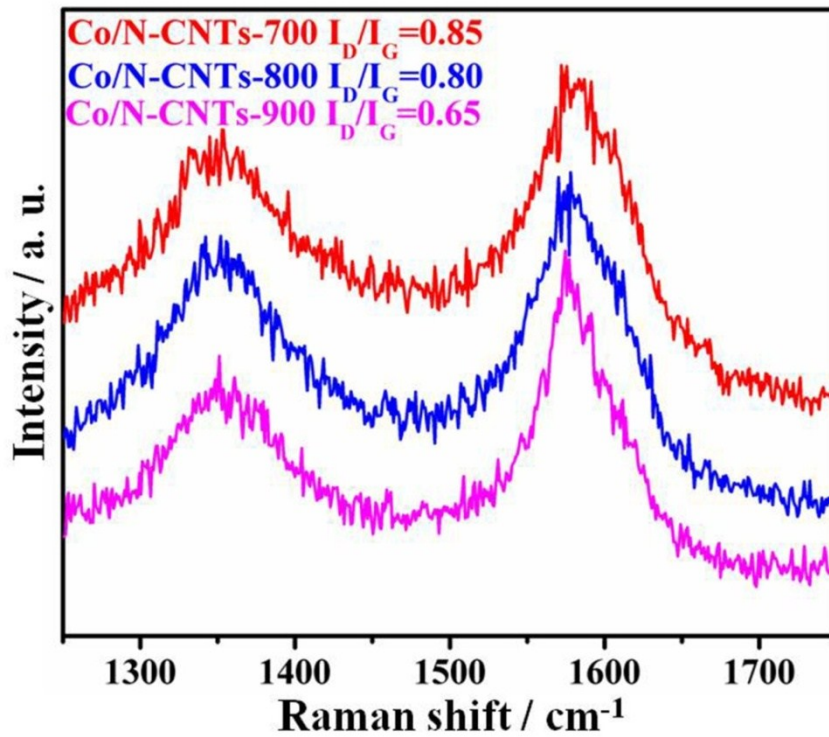

**Fig. S2** Raman spectra for Co/N-CNTs samples carbonized under different temperatures.

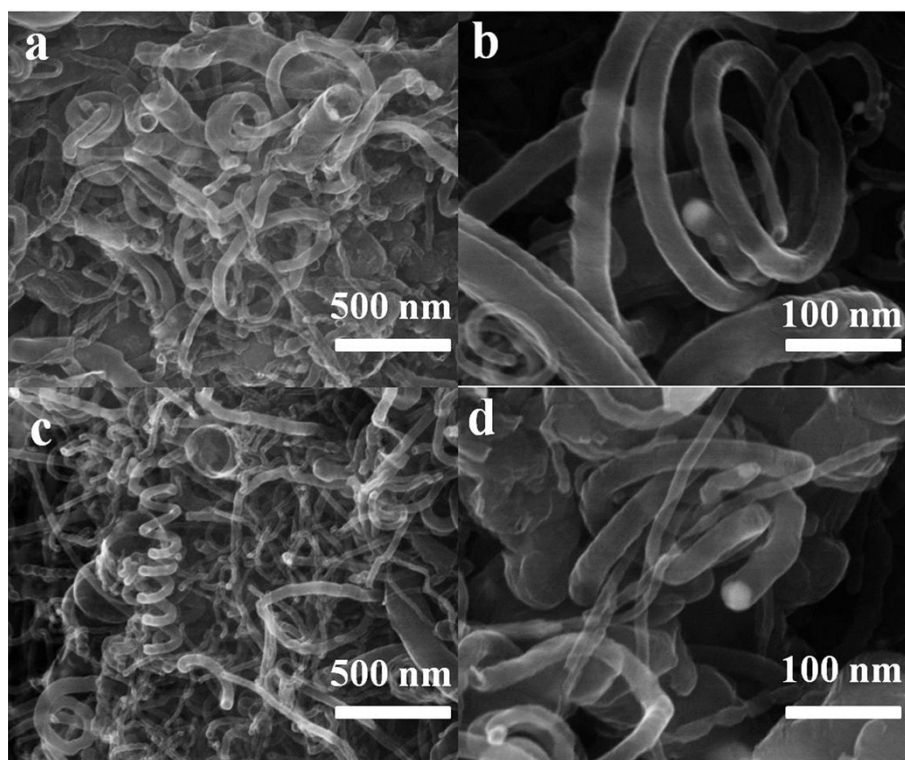

**Fig. S3** SEM images of (a,b) Co/N-CNTs-800, (c,d) Co/N-CNTs-900.

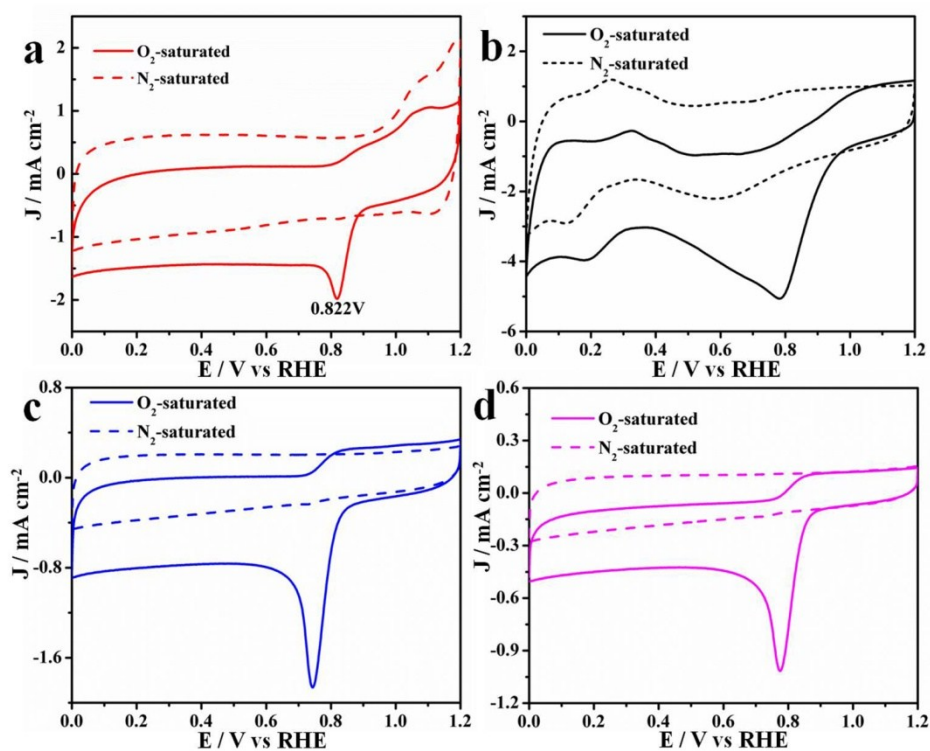

**Fig. S4** Cyclic voltammograms of (a) Co/N-CNTs-700, (b) Pt/C, (c) Co/N-CNTs-800 and (d) Co/N-CNTs-900 at a scan rate of  $50 \text{ mV s}^{-1}$ .

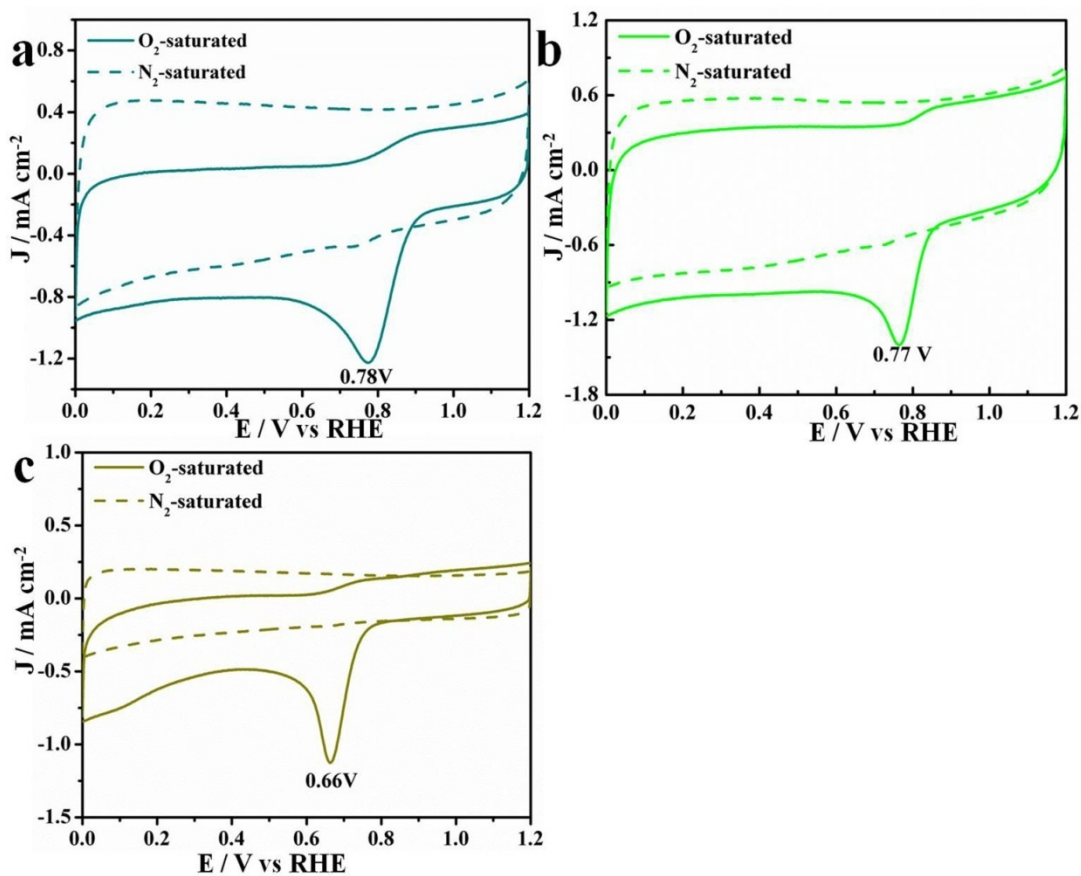

**Fig. S5** Cyclic voltammograms of (a) Fe/N-CNTs, (b) Ni/N-CNTs and (c) MWCNTs at a scan rate of  $50\text{ mV s}^{-1}$ .

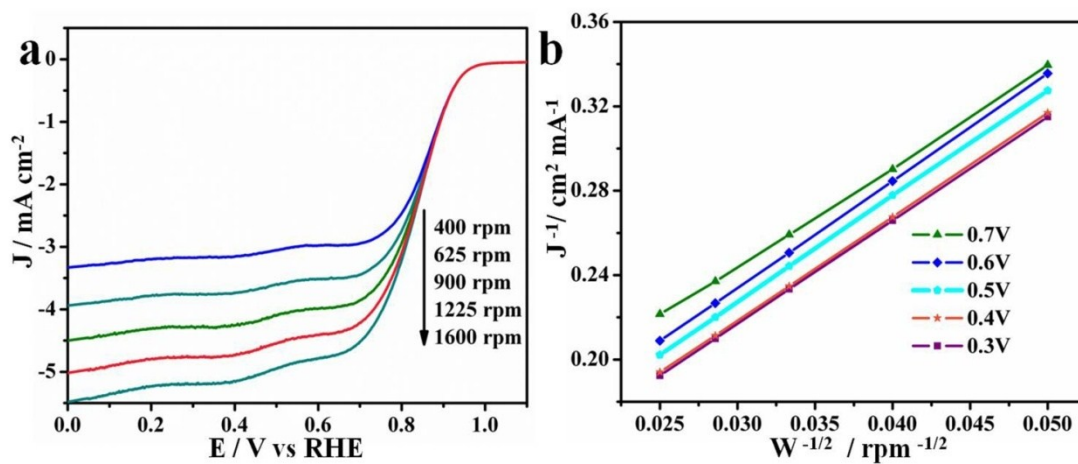

**Fig. S6** (a) Linear sweep voltammograms and (b) K-L plots at different potentials for Fe/N-CNTs catalyst in  $\text{O}_2$ -saturated  $0.1\text{ M KOH}$  solution.

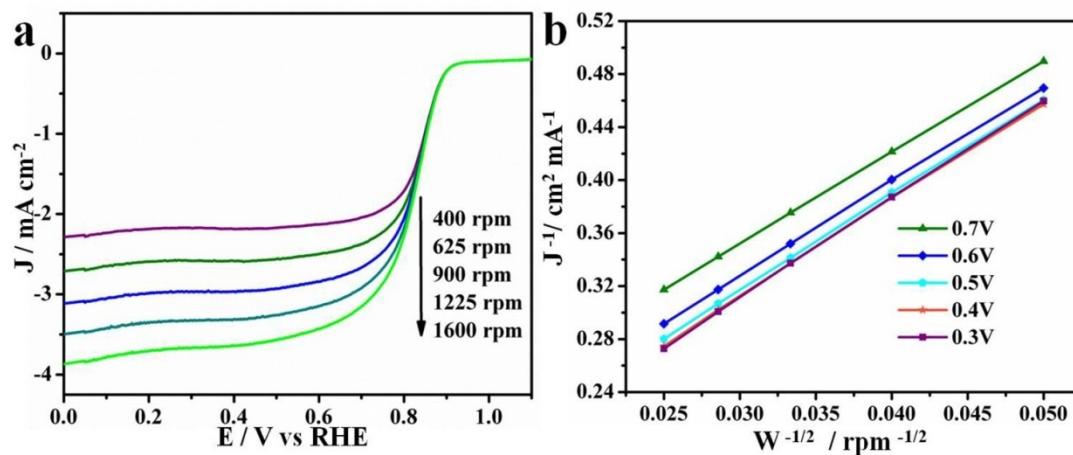

**Fig. S7** (a) Linear sweep voltammograms and (b) K-L plots at different potentials for Ni/N-CNTs catalyst in O<sub>2</sub>-saturated 0.1 M KOH solution.

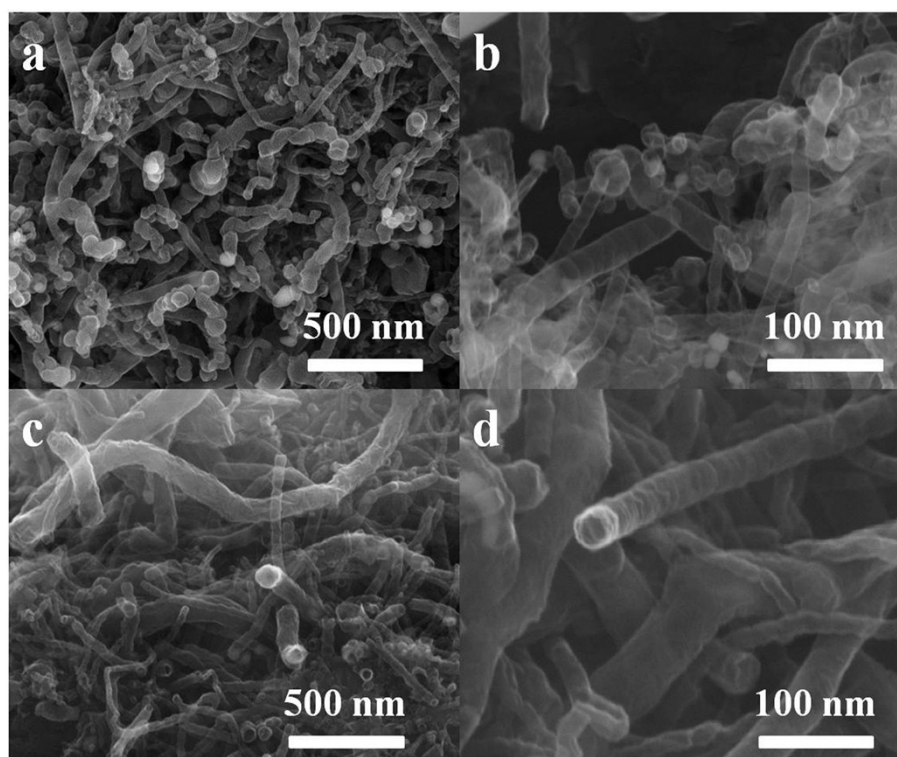

**Fig. S8** SEM images of (a,b) Fe/N-CNTs, (c,d) Ni/N-CNTs.

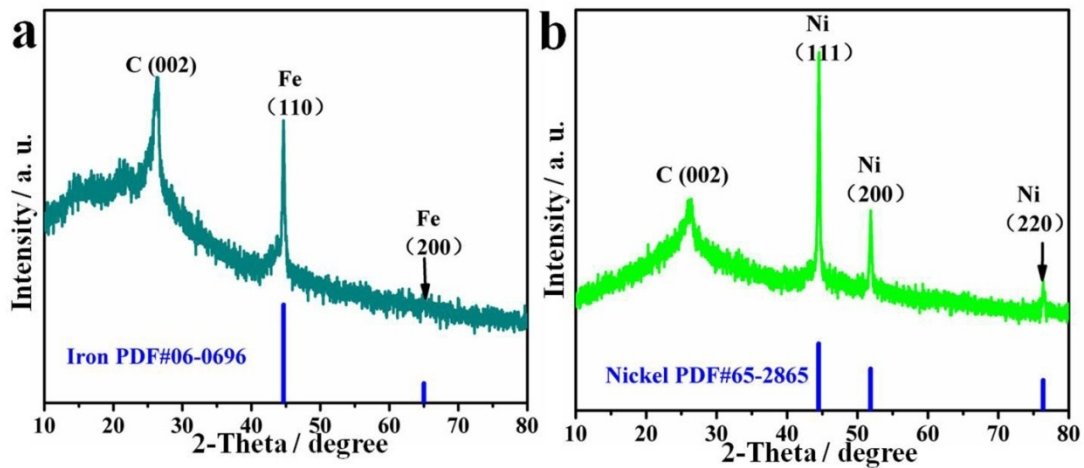

**Fig. S9** (a) XRD pattern of Fe/N-CNTs and the JCPDS cards #06-0696 for the corresponding metallic iron. (b) XRD pattern of Ni/N-CNTs and the JCPDS cards #65-2865 for the corresponding metallic nickel.

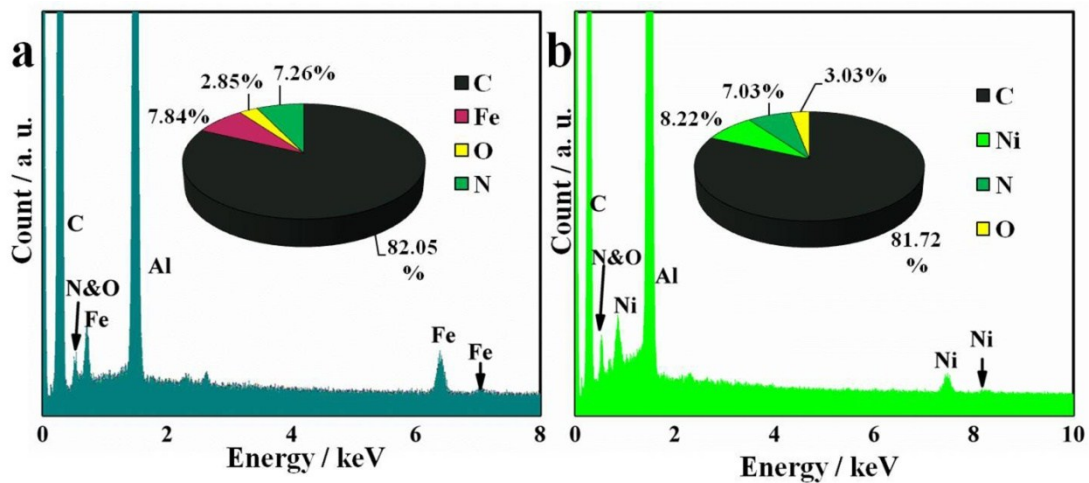

**Fig. S10** EDX spectra and the content of C, N, Metal and O in (a) Fe/N-CNTs and (b) Ni/N-CNTs, the signal of Al is from the Al substrates.

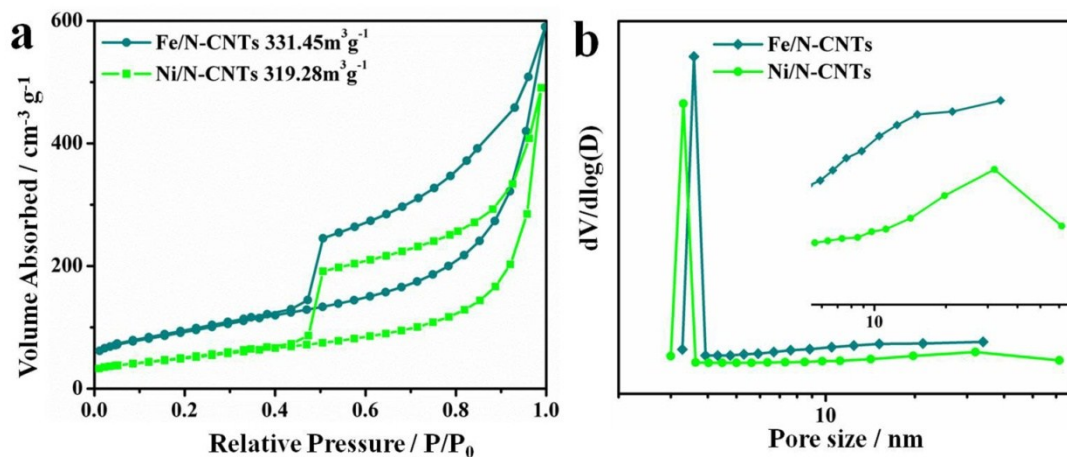

**Fig. S11** (a)  $N_2$  adsorption/desorption isotherm and (b) the corresponding pore size distribution of the Fe/N-CNTs and Ni/N-CNTs.

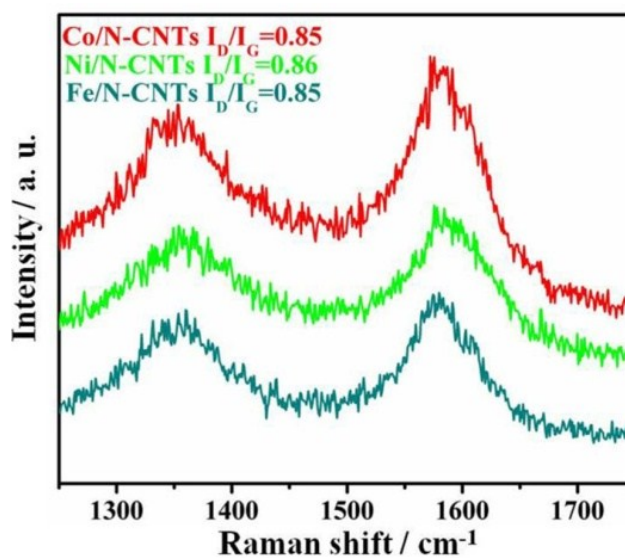

**Fig. S12** Raman spectra for Co/N-CNTs, Ni/N-CNTs and Fe/N-CNTs samples.

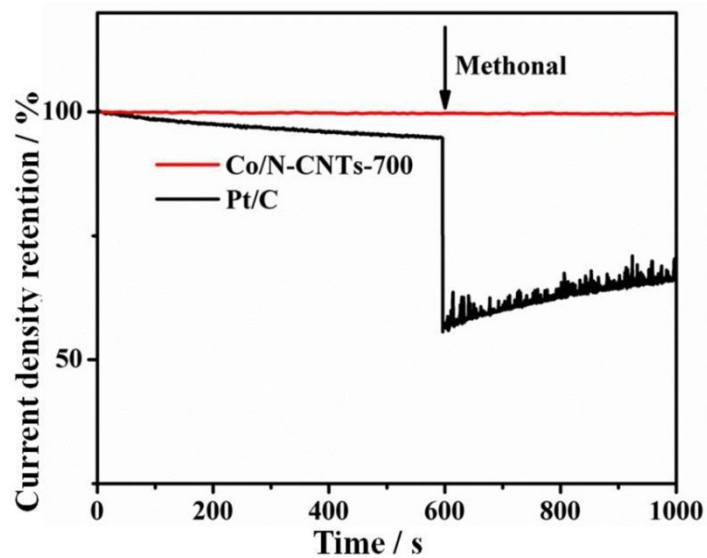

**Fig. S13** I-t plots of Co/N-CNTs and Pt/C at 0.55 V (vs. RHE) with a rotation rate of 900 rpm in O<sub>2</sub>-saturated 0.1 M KOH with the adding of methanol (1.0 M).

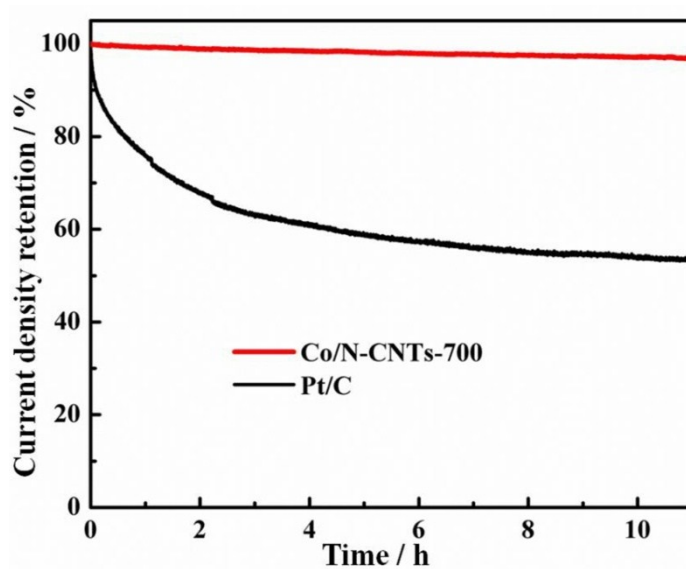

**Fig. S14** I-t plots of Co/N-CNTs and Pt/C at 0.6 V.



**Table S1 Elemental composition by XPS (at%)**

| Sample    | C 1s  | N 1s | O 1s | M 2p (M = Fe,Co,Ni) |
|-----------|-------|------|------|---------------------|
| Co/N-CNTs | 87.78 | 8.36 | 2.21 | 1.63                |
| Fe/N-CNTs | 87.69 | 8.42 | 2.32 | 1.57                |
| Ni/N-CNTs | 87.52 | 8.49 | 2.26 | 1.73                |

**Table S2. Comparison of bifunctional oxygen electrode activities of Co/N-CNTs-700 vis-à-vis some representative bifunctional oxygen catalysts recently reported.**  
[a]

| Catalysts                                           | E <sub>ORR</sub> (V) at J = -3 mA cm <sup>-2</sup> | E <sub>OER</sub> (V) at J = 10 mA cm <sup>-2</sup> | Oxygen electrode ΔE (V) = E <sub>OER</sub> - E <sub>ORR</sub> | Refs.     |
|-----------------------------------------------------|----------------------------------------------------|----------------------------------------------------|---------------------------------------------------------------|-----------|
| NiCo <sub>2</sub> S <sub>4</sub> @N/S-rGO           | 0.76                                               | 1.70                                               | 0.94                                                          | S1        |
| NiCo <sub>2</sub> O <sub>4</sub>                    | 0.75                                               | 1.72                                               | 0.97                                                          | S2        |
| 20 wt% Ir/C                                         | 0.69                                               | 1.61                                               | 0.92                                                          | S3        |
| NiCo <sub>2</sub> O <sub>4</sub> -A <sub>1</sub>    | 0.78                                               | 1.62                                               | 0.84                                                          | 19        |
| N-graphene/CNT                                      | 0.69                                               | 1.65                                               | 0.96                                                          | 27        |
| Co/N-C-800                                          | 0.74                                               | 1.60                                               | 0.86                                                          | S4        |
| Pt/C BSCF/C=4:1                                     | 0.81                                               | 1.61                                               | 0.80                                                          | S5        |
| Fe <sub>3</sub> C@NG800-0.2                         | 0.81                                               | 1.59                                               | 0.78                                                          | 13        |
| Ni <sub>0.4</sub> Co <sub>2.56</sub> O <sub>4</sub> | 0.79                                               | 1.75                                               | 0.96                                                          | S6        |
| CoS <sub>2</sub> (400)/N,S-GO                       | 0.79                                               | 1.61                                               | 0.82                                                          | S7        |
| Co/N-CNTs-700                                       | 0.84                                               | 1.62                                               | 0.78                                                          | This work |

[a]Here all the potential values were converted to vs. RHE for comparison.

**References:**

- S1. Q. Liu, J. Jin and J. Zhang, *ACS Appl. Mater. Interfaces*, 2013, **5**, 5002.  
 S2. C. Jin, F. Lu, X. Cao, Z. Yang and R. Yang, *J. Mater. Chem. A*, 2013, **1**, 12170.  
 S3. Y. Gorlin and T. F. Jaramillo, *J. Am. Chem. Soc.*, 2010, **132**, 13612.  
 S4. Z. Wen, S. Ci, Y. Hou and J. Chen, *Angew. Chem., Int. Ed.*, 2014, **53**, 6496.

- S5. J. Jin, F. Pan, L. Jiang, X. Fu, A. Liang, Z. Wei, J. Zhang and G. Sun, *ACS Nano*, 2014, **8**, 3313.
- S6. T.N. Lambert, J.A. Vigil, S.E. White, D.J. Davis, S.J. Limmer, P.D. Burton, E.N. Coker, T.E. Beechem and M.T. Brumbach, *Chem. Commun.*, 2015, **51**, 9511.
- S7. P. Ganesan, M. Prabu, J. Sanetuntikul and S. Shanmugam, *ACS Catal.*, 2015, **6**, 3625.
